# Supplementary material
Source: PubMed Central journal article supplement (PMC4992609)
Supplement: NIHMS791086-supplement.pdf [file NIHMS791086-supplement.pdf]

**Appendix**  
**Continued Importance of Sexually Transmitted Disease Clinics in the Era of the Affordable Care Act**  
**Mehtani et al.**

**Appendix Table 1.** Comparison of Baseline Characteristics of Reported STI Diagnoses Before and After Medicaid Expansion, Baltimore City, MD

|                  | <b>2013</b> | <b>2014</b> | <b>p-value</b>    |
|------------------|-------------|-------------|-------------------|
| <b>Syphilis</b>  | n=375       | n=380       |                   |
| Mean age (y)     | 32.25       | 32.61       | 0.4469            |
| Sex, male        | 80.80%      | 81.84%      | 0.7133            |
| Race, black      | 84.91%      | 85.56%      | 0.8008            |
| Ethnicity,       | 4.55%       | 2.67%       | 0.1678            |
| Hispanic         |             |             |                   |
| <b>HIV</b>       | n=430       | n=298       |                   |
| Mean age (y)     | 38.06       | 37.12       | 0.7737            |
| Sex, male        | 73.95%      | 73.49%      | 0.8888            |
| Race, black      | 86.75%      | 89.73%      | 0.2304            |
| Ethnicity,       | 1.90%       | 1.71%       | 0.8522            |
| Hispanic         |             |             |                   |
| <b>Chlamydia</b> | n=7,129     | n=7,241     |                   |
| Mean age (y)     | 22.19       | 22.73       | <b>&lt;0.0001</b> |
| Sex, male        | 26.12%      | 30.48%      | <b>&lt;0.0001</b> |
| Race, black      | 91.49%      | 90.27%      | <b>0.0190</b>     |
| Ethnicity,       | 2.63%       | 2.47%       | 0.5593            |
| Hispanic         |             |             |                   |
| <b>Gonorrhea</b> | n=2,127     | n=2,128     |                   |
| Mean age (y)     | 25.80       | 26.03       | 0.4455            |
| Sex, male        | 50.92%      | 51.63%      | 0.7711            |
| Race, black      | 90.67%      | 88.57%      | <b>0.0285</b>     |
| Ethnicity,       | 1.54%       | 1.34%       | 0.5965            |
| Hispanic         |             |             |                   |

*Note:* Boldface indicates statistical significance ( $p < 0.05$ ).
